# Supplementary material for: Phage Biocontrol of Pseudomonas aeruginosa in Water
Source: MDPI journal article supplement (doi:10.3390/v13050928), 2021-05-17
Supplement: s1 [file s1]

Table S1. Information regarding the accession number and species affiliation for the *Pbunavirus* phages used for genome comparison in Figures 3-5.

| Phage isolate                        | Accession number | Defined species                  |
|--------------------------------------|------------------|----------------------------------|
| Pseudomonas phage 14-1               | NC_011703        | <i>Pseudomonas virus 141</i>     |
| Pseudomonas phage vB_PaeM_C1-14_Ab28 | NC_026600        | <i>Pseudomonas virus Ab28</i>    |
| Pseudomonas phage vB_PaeM_CEB_DP1    | NC_041870        | <i>Pseudomonas virus CEBDP1</i>  |
| Pseudomonas phage DL60               | NC_028745        | <i>Pseudomonas virus DL60</i>    |
| Pseudomonas phage DL68               | NC_028971        | <i>Pseudomonas virus DL68</i>    |
| Pseudomonas phage vB_PaeM_E215       | NC_042080        | <i>Pseudomonas virus E215</i>    |
| Pseudomonas phage vB_PaeM_E217       | NC_042079        | <i>Pseudomonas virus E217</i>    |
| Pseudomonas phage F8                 | NC_007810        | <i>Pseudomonas virus F8</i>      |
| Pseudomonas phage JG024              | NC_017674        | <i>Pseudomonas virus JG024</i>   |
| Pseudomonas phage KPP12              | NC_019935        | <i>Pseudomonas virus KPP12</i>   |
| Pseudomonas phage phiKTN6            | NC_041865        | <i>Pseudomonas virus KTN6</i>    |
| Pseudomonas phage LBL3               | NC_011165        | <i>Pseudomonas virus LBL3</i>    |
| Pseudomonas phage LMA2               | NC_011166        | <i>Pseudomonas virus LMA2</i>    |
| Pseudomonas phage NH-4               | JN254800         | <i>Pseudomonas virus NH4</i>     |
| Pseudomonas phage PA5                | NC_041902        | <i>Pseudomonas virus PA5</i>     |
| Pseudomonas phage PaGU11             | AP018815         | no defined species               |
| Pseudomonas phage PB1                | EU716414         | <i>Pseudomonas virus PB1</i>     |
| Pseudomonas phage phiKT28            | KP340287         | no defined species               |
| Pseudomonas phage vB_Pae_PS44        | NC_028939        | <i>Pseudomonas virus PS44</i>    |
| Pseudomonas phage SN                 | FM887021         | <i>Pseudomonas virus SN</i>      |
| Burkholderia ambifaria phage BcepF1  | NC_009015        | <i>Burkholderia virus BcepF1</i> |
