# Supplementary material for: Phage Biocontrol of Pseudomonas aeruginosa in Water
Source: MDPI journal article supplement (doi:10.3390/v13050928), 2021-05-17
Supplement: s1 [file s1]

## Sheet: V523
					Best match to viralDB					best match to PFAM
ORF #	strand	start	stop	predicted function	Accession number	% aa id	alignment length	e-value	bitscore	hmm acc	hmm name	e-value
1	-	2	304	hypothetical protein	YP_009593753.1	98	100	1.12e-64	192
2	-	315	563	hypothetical protein	YP_009593754.1	100	48	1.56e-26	93.6
3	-	659	823	hypothetical protein	YP_009619354.1	100	54	3.06e-34	112
4	-	866	1153	hypothetical protein	YP_009619355.1	100	64	6.92e-41	130
5		1228	2610	terminase large subunit	YP_007238156.1	99.565	460	0	949	PF04466.13	Terminase_3	3.5e-34
6	-	2647	3030	hypothetical protein	YP_009597849.1	100	127	2.76e-88	254
7	-	3030	3245	hypothetical protein	YP_009593243.1	100	71	5.81e-48	147
8	-	3245	3595	hypothetical protein	YP_009597847.1	99.138	116	2.59e-81	235
9	-	3639	4022	hypothetical protein	YP_009619360.1	99.213	127	2.18e-86	249
10	-	4025	4804	hypothetical protein	YP_009593246.1	98.456	259	0	529	PF10979.8	DUF2786	8.9e-11
11	-	4890	5327	hypothetical protein	YP_009597844.1	99.31	145	2.51e-100	286
12	-	5344	5931	hypothetical protein	YP_009619363.1	99.487	195	3.81e-147	408
13	-	5941	6036	hypothetical protein	YP_004221740.1	96.774	31	7.3e-14	58.9
14	-	6033	6965	hypothetical protein	YP_002154245.1	99.032	310	0	635
15	-	7069	7416	hypothetical protein	YP_007238167.1	98.261	115	2.17e-78	228
16	-	7665	7976	hypothetical protein	YP_009124336.1	99.029	103	3.75e-70	206
17	-	7982	8185	hypothetical protein	YP_009619534.1	98.507	67	4.29e-43	135
18	-	8182	8505	hypothetical protein	YP_009619368.1	100	107	2.96e-78	227
19	-	8537	8938	hypothetical protein	YP_009619369.1	99.248	133	5.93e-94	268
20	+	9119	11416	putative minor head protein	YP_009124340.1	99.869	765	0	1581	PF06381.11	DUF1073	3e-93
21	+	11416	12252	putative minor capsid protein	YP_009124341.1	100	278	0	578	PF04233.14	Phage_Mu_F	1.4e-09
22	+	12271	12477	hypothetical protein	YP_009597833.1	100	68	4.06e-44	137
23	+	12474	12614	hypothetical protein	YP_009593774.1	97.826	46	1.34e-25	89.7
24	+	13128	14561	putative structural protein	YP_007238176.1	99.79	477	0	970	PF09979.9	DUF2213	6.5e-37
25	+	14565	15200	putative structural protein	YP_002418830.1	99.052	211	7.32e-149	414
26	+	15210	16358	putative structural protein	YP_009593777.1	99.738	382	0	779
27	+	16460	16897	hypothetical protein	YP_009619377.1	99.31	145	4.74e-106	300
28	+	16912	17379	putative structural protein	YP_009593779.1	100	155	6.61e-113	318	PF13262.6	DUF4054	3.3e-29
29	+	17403	17774	putative structural protein	YP_007238181.1	100	123	1.25e-87	252
30	+	17782	18333	putative structural protein	YP_009593265.1	100	183	1.3e-136	380
31	+	18330	18911	hypothetical protein	YP_009619453.1	100	193	3.86e-140	390
32	+	18927	20441	putative structural protein	YP_009593783.1	99.603	504	0	1012	PF11863.8	DUF3383	1.4e-119
33	+	20500	20952	putative tail fiber protein	YP_009593784.1	100	150	2.6e-106	301
34	+	20952	21275	putative structural protein	YP_009593269.1	100	107	2.74e-78	227
35	+	21272	21622	putative structural protein	YP_009593786.1	100	116	3.89e-81	235
36	+	21625	22056	hypothetical protein	YP_009593787.1	95.105	143	3.53e-91	262
37	+	22066	22569	putative structural protein	YP_009593272.1	98.204	167	7.98e-117	329
38	+	22569	23108	putative structural protein	YP_009593789.1	98.883	179	5.8e-130	363
39	+	23117	23710	putative tail fiber protein	YP_009193795.1	97.97	197	1.56e-141	394
40	+	23720	24148	hypothetical protein	YP_009124359.1	98.592	142	3.57e-102	290
41	+	24152	26728	putative lytic tail protein	YP_002154272.1	98.485	858	0	1725	PF01464.20	SLT	1.5e-18
42	+	26728	27591	putative structural protein	YP_007238193.1	100	287	0	590
43	+	27591	28124	hypothetical protein	YP_006200806.1	98.87	177	2.91e-129	361
44	+	28180	28845	putative baseplate protein	YP_009593795.1	100	221	6e-164	453	PF18352.1	Gp138_N	2.1e-16
45	+	28902	30155	putative baseplate protein	YP_006200808.1	100	417	0	834	PF04865.14	Baseplate_J	7e-10
46	+	30152	31666	putative structural protein	YP_002418851.1	99.008	504	0	1026	PF11041.8	DUF2612	6.2e-17
47	+	31671	34559	putative tail protein	YP_002418852.1	97.713	962	0	1914
48	+	34561	34989	putative tail fibers component	YP_009593283.1	100	142	3.73e-102	290
49	+	34989	35651	putative endolysin	YP_006200812.1	99.545	220	1.03e-164	454	PF00182.19	Glyco_hydro_19	5.4e-07
50	-	35675	35926	hypothetical protein	YP_009619472.1	100	83	2.78e-53	162
51	-	36206	37117	putative DNA ligase	YP_006200814.1	99.34	303	0	629	PF14743.6	DNA_ligase_OB_2	3.8e-11
52	-	37172	37726	putative DNA binding protein	YP_009215178.1	98.913	184	1.7e-134	375
53	-	37723	38328	hypothetical protein	YP_002364359.1	100	201	3.55e-142	396
54	-	38382	39278	hypothetical protein	YP_006200817.1	100	298	0	605
55	-	39367	39987	hypothetical protein	YP_009619477.1	100	206	3.56e-148	412
56	-	40082	41641	putative helicase	YP_006200819.1	99.615	519	0	1068	PF00176.23	SNF2_N	2.6e-19
57	-	41638	42054	putative helicase	YP_002154288.1	99.275	138	3.04e-99	282
58	-	42041	45151	putative DNA polymerase III alpha subunit	YP_002154289.1	99.517	1036	0	2133	PF07733.12	DNA_pol3_alpha	3.6e-60
59	-	45148	45702	putative DNA polymerase III epsilon subunit	YP_009593810.1	99.457	184	8.27e-138	384	PF00929.24	RNase_T	4e-15
60	-	45778	46818	putative 3'-phosphatase 5'-polynucleotide kinase	YP_009193773.1	91.117	349	0	626
61	-	46821	47012	hypothetical protein	YP_002455990.1	100	63	8.78e-39	124
62	-	47014	47931	putative thymidylate synthase	YP_001294476.1	99.672	305	0	637	PF02511.15	Thy1	1.9e-29
63	-	47931	48137	hypothetical protein	YP_009619413.1	94.118	68	8.96e-41	129
64	-	48145	48411	hypothetical protein	YP_009597887.1	97.727	88	2.27e-60	180
65	-	48411	48629	putative tail assembly protein	YP_002154296.1	100	72	3.43e-49	150
66	-	48613	48831	hypothetical protein	YP_009593301.1	100	72	1.57e-46	144
67	-	48831	49061	hypothetical protein	YP_009619417.1	100	76	9.15e-53	160
68	-	49149	50150	hypothetical protein	YP_009619418.1	99.7	333	0	687
69	-	50255	51148	putative structural protein	YP_002154300.1	99.327	297	0	551
70	-	51309	52496	putative DNA helicase	YP_002154301.1	100	395	0	822	PF13604.6	AAA_30	1.4e-18
71	-	52483	52905	hypothetical protein	YP_009619421.1	97.857	140	5.72e-99	282
72	+	53073	53858	hypothetical protein	YP_009593822.1	100	261	0	534
73	+	53868	54839	hypothetical protein	YP_007238224.1	83.333	282	4.97e-178	496
74	+	54863	55321	hypothetical protein	YP_002154305.1	97.368	152	1.93e-107	304
75	+	55318	56394	putative DNA primase	YP_009619497.1	100	358	0	750	PF16793.5	RepB_primase	3.4e-81
76	+	56400	56585	hypothetical protein	YP_009619498.1	100	61	5.28e-36	117
77	+	56733	58472	putative DNA primase	YP_009593312.1	99.655	579	0	1192	PF05272.11	VirE	1.5e-20
78	+	59436	60005	hypothetical protein	YP_002364384.1	99.471	189	1.52e-140	391
79	-	60175	60789	hypothetical protein	YP_009597869.1	99.02	204	5.6e-146	406
80	-	60979	61683	hypothetical protein	YP_002154311.1	97.009	234	3.59e-166	459
81	-	61694	62005	hypothetical protein	YP_002364387.1	100	103	1.53e-75	219
82	-	62058	62282	hypothetical protein	YP_002418887.1	100	73	3.96e-47	145
83	-	62333	62557	hypothetical protein	YP_007002630.1	100	74	5.18e-50	153
84	-	62622	62948	hypothetical protein	YP_007002631.1	97.222	108	7.83e-75	218
85	-	62949	63593	hypothetical protein	YP_007002632.1	99.533	214	3.03e-158	438
86	-	63625	63837	hypothetical protein	YP_009619509.1	100	70	9.97e-49	149
87	-	63834	64034	hypothetical protein	YP_002456017.1	92.424	66	3.09e-39	125
88	-	64031	64246	hypothetical protein	YP_009619441.1	98.592	71	9.46e-47	144
89	-	64243	64443	hypothetical protein	YP_007002636.1	98.485	66	8.07e-43	134
90	-	64440	64691	hypothetical protein	YP_007002637.1	100	83	3.73e-57	172
91	-	64804	65016	hypothetical protein
92	-	65060	65290	hypothetical protein	YP_009206114.1	84.211	76	4.79e-44	138
93	-	65371	65559	hypothetical protein	YP_006200857.1	92.982	57	2.87e-36	117
94	-	65562	66284	putative capsid and scaffold protein	YP_006200858.1	100	228	1.27e-168	466

## Sheet: V524
					Best match to viralDB					best match to PFAM
ORF #	strand	start	stop	function	accesssion number	% aa id	alignment length	e-value	bitscore	hmm acc	hmm name	e-value
1	-	2	304	hypothetical protein	YP_009593753.1	100	100	1.44e-66	197
2	-	315	461	hypothetical protein	YP_009593754.1	100	48	8.03e-27	92.8
3	+	638	2020	terminase large subunit	YP_009593757.1	100	460	0	951	PF04466.13	Terminase_3	1.8e-34
4	-	2057	2440	hypothetical protein	YP_002364312.1	99.213	127	1.46e-88	254
5	-	2440	2655	hypothetical protein	YP_009619358.1	98.592	71	1.29e-47	147
6	-	2655	2987	hypothetical protein	YP_007002553.1	100	110	5.53e-79	229
7	-	3031	3429	hypothetical protein	YP_001294425.1	95.489	133	1.55e-86	250
8	-	3432	4211	hypothetical protein	YP_009593762.1	99.228	259	0	534	PF10979.8	DUF2786	1.4e-10
9	-	4298	4735	hypothetical protein	YP_002154243.1	97.931	145	4.76e-99	282
10	-	4751	5338	hypothetical protein	YP_009619363.1	99.487	195	3.34e-147	408
11	-	5440	6372	hypothetical protein	YP_009211337.1	98.065	310	0	626
12	-	6476	6823	hypothetical protein	YP_009124335.1	100	115	2.72e-80	233
13	-	7072	7383	hypothetical protein	YP_009124336.1	100	103	1.08e-70	207
14	-	7389	7592	hypothetical protein	YP_009619534.1	100	67	5.62e-44	137
15	-	7589	7912	hypothetical protein	YP_002154249.1	99.065	107	1.78e-76	222
16	-	7944	8345	hypothetical protein	YP_009619369.1	100	133	4.54e-95	271
17	+	8526	10823	putative minor head protein	YP_009619370.1	99.739	765	0	1582	PF06381.11	DUF1073	3e-93
18	+	10823	11659	putative minor capsid protein	YP_009124341.1	100	278	0	578	PF04233.14	Phage_Mu_F	1.4e-09
19	+	11678	11884	hypothetical protein	YP_009597833.1	100	68	4.06e-44	137
20	+	11881	12021	hypothetical protein	YP_009619540.1	100	46	3.79e-26	90.9
21	+	12535	13968	putative structural protein	YP_009124343.1	99.581	477	0	965	PF09979.9	DUF2213	6.5e-37
22	+	13972	14607	putative structural protein	YP_009124344.1	100	211	2.14e-150	417
23	+	14617	15765	putative major structural protein	YP_002154257.1	100	382	0	783
24	+	15867	16304	hypothetical protein	YP_009619377.1	100	145	9.23e-107	302
25	+	16319	16786	putative structural protein	YP_009593779.1	100	155	6.61e-113	318	PF13262.6	DUF4054	3.3e-29
26	+	16810	17181	putative structural protein	YP_009593780.1	100	123	1.25e-87	252
27	+	17189	17740	putative structural protein	YP_009593265.1	100	183	1.3e-136	380
28	+	17737	18318	hypothetical protein	YP_009619453.1	100	193	3.86e-140	390
29	+	18334	19848	putative structural protein	YP_009593783.1	99.802	504	0	1014	PF11863.8	DUF3383	8.4e-120
30	+	19907	20359	putative structural protein, tail fiber	YP_009593784.1	100	150	2.6e-106	301
31	+	20359	20682	putative structural protein	YP_009593269.1	100	107	2.74e-78	227
32	+	20679	21029	putative structural protein	YP_009593786.1	100	116	3.89e-81	235
33	+	21031	21462	hypothetical protein	YP_009593787.1	100	143	7.12e-97	277
34	+	21472	21975	putative structural protein	YP_007238188.1	100	167	6.19e-118	332
35	+	21975	22514	putative structural protein	YP_009593789.1	100	179	8.14e-131	365
36	+	22523	23116	putative tail fiber protein	YP_009124358.1	98.985	197	1.34e-141	394
37	+	23126	23554	hypothetical protein	YP_009619462.1	100	142	6.5e-104	295
38	+	23558	26134	putative lytic tail protein	YP_002154272.1	99.65	858	0	1741	PF01464.20	SLT	4.7e-19
39	+	26134	26997	putative structural protein	YP_009593277.1	100	287	0	590
40	+	26997	27530	hypothetical protein	YP_009619465.1	98.87	177	1.67e-128	359
41	+	27688	28251	putative baseplate protein	YP_007238195.1	99.465	187	1.79e-137	384	PF18352.1	Gp138_N	1.3e-16
42	+	28309	29562	putative baseplate protein	YP_006200808.1	99.76	417	0	832	PF04865.14	Baseplate_J	7e-10
43	+	29559	31073	putative structural protein	YP_009619396.1	99.405	504	0	1030	PF11041.8	DUF2612	6.3e-17
44	+	31051	33972	putative tail fiber protein	YP_009124366.1	98.548	964	0	1921
45	+	33974	34402	putative tail fiber component	YP_007238199.1	96.479	142	5.52e-99	282
46	+	34402	35064	putative endolysin	YP_009593284.1	100	220	1.68e-165	456	PF00182.19	Glyco_hydro_19	4.5e-07
47	-	35089	35340	hypothetical protein	YP_009619472.1	100	83	2.78e-53	162
48	-	35620	36531	putative DNA ligase	YP_009593802.1	99.67	303	0	632	PF14743.6	DNA_ligase_OB_2	4.7e-12
49	-	36586	37140	putative DNA-binding protein	YP_009593803.1	100	184	3.16e-136	380
50	-	37137	37742	hypothetical protein	YP_009593804.1	100	201	6.15e-142	395
51	-	37796	38695	hypothetical protein	YP_009619404.1	100	299	0	606
52	-	38784	39404	hypothetical protein	YP_002418860.1	99.515	206	2.15e-147	410
53	-	39499	41058	putative helicase	YP_007238207.1	99.615	519	0	1065	PF00176.23	SNF2_N	8e-19
54	-	41055	41465	putative DNA helicase	YP_007002602.1	100	136	1.01e-97	278
55	-	41458	44568	putative DNA Polymerase III alpha subunit	YP_007238209.1	99.807	1035	0	2136	PF07733.12	DNA_pol3_alpha	3.6e-60
56	-	44565	45119	putative DNA polymerase III epsilon subunit	YP_009593810.1	100	184	4.28e-138	384	PF00929.24	RNase_T	1.3e-15
57	-	45195	46211	putative 3'-phosphatase 5'-polynucleotide kinase	YP_009597891.1	98.817	338	0	690
58	-	46214	46405	hypothetical protein	YP_006200824.1	96.825	63	4.21e-38	124
59	-	46407	47324	putative thymidylate synthase	YP_006200825.1	99.344	305	0	640	PF02511.15	Thy1	1.1e-29
60	-	47324	47530	hypothetical protein	YP_009619413.1	100	68	6.36e-44	137
61	-	47538	47762	hypothetical protein	YP_002154295.1	98.649	74	2.1e-49	152
62	-	47795	48013	putative tail assembly protein	YP_009215165.1	98.611	72	3.41e-48	148
63	-	47997	48215	hypothetical protein	YP_009619488.1	98.611	72	8.21e-45	140
64	-	48215	48445	hypothetical protein	YP_009593817.1	100	76	1.06e-52	160
65	-	48533	49534	hypothetical protein	YP_009619418.1	99.399	333	0	685
66	-	49639	50532	putative structural protein	YP_009593819.1	99.663	297	0	551
67	-	50690	51877	putative DNA helicase	YP_009597880.1	99.494	395	0	821	PF13604.6	AAA_30	2e-19
68	-	51864	52286	hypothetical protein	YP_009619421.1	99.286	140	7.43e-100	284
69	+	52454	53239	hypothetical protein	YP_009593822.1	99.617	261	0	532
70	+	53250	54329	hypothetical protein	YP_009593823.1	61.202	366	8.49e-135	388
71	+	54353	54811	hypothetical protein	YP_002154305.1	97.368	152	6.37e-107	303
72	+	54808	55884	putative DNA primase	YP_009619497.1	99.721	358	0	748	PF16793.5	RepB_primase	2.5e-80
73	+	55890	56075	hypothetical protein	YP_009124395.1	95.082	61	6.28e-34	111
74	+	56223	57962	putative DNA primase	YP_009619427.1	96.2	579	0	1117	PF05272.11	VirE	1.5e-20
75	+	58927	59496	hypothetical protein	YP_002364384.1	99.471	189	1.52e-140	391
76	-	59666	60280	hypothetical protein	YP_009597869.1	99.51	204	5.9e-147	408
77	-	60470	61141	hypothetical protein	YP_007238232.1	97.309	223	9.06e-161	445
78	-	61152	61463	hypothetical protein	YP_009593831.1	98.058	103	1.75e-74	217
79	-	61516	61737	hypothetical protein	YP_002418887.1	100	73	5.16e-47	145
80	-	61747	62004	hypothetical protein	YP_002418888.1	100	84	1.86e-56	170
81	-	62055	62279	hypothetical protein	YP_009619436.1	100	74	6.67e-50	152
82	-	62341	62670	hypothetical protein	YP_009619437.1	97.248	109	7.53e-76	221
83	-	62671	63315	hypothetical protein	YP_009619438.1	96.262	214	1.57e-152	423
84	-	63347	63559	hypothetical protein	YP_009619509.1	98.571	70	2.11e-47	146
85	-	63556	63756	hypothetical protein	YP_009619440.1	95.455	66	1.93e-41	130
86	-	63753	63968	hypothetical protein	YP_009593324.1	100	71	5e-47	145
87	-	63965	64075	hypothetical protein	YP_007002636.1	97.222	36	5.89e-20	75.5
88	-	64179	64430	hypothetical protein	YP_002154322.1	100	83	4.49e-57	171
89	-	64517	64705	hypothetical protein	YP_009593843.1	98.387	62	5.53e-41	129
90	-	64708	65430	putative structural protein	YP_002154325.1	97.5	240	5.55e-177	487
